# Supplementary material
Source: publisher figshare collection journal article supplement (https://acs.figshare.com/ndownloader/files/8860012)
Supplement: Supplementary file 1 [file 8860012]

 
data_x 
 
_audit_creation_method            SHELXL-97 
_chemical_name_systematic 
; 
 ? 
; 
_chemical_name_common             ? 
_chemical_melting_point           ? 
_chemical_formula_moiety         
 'C21 H27 N O2 S, H2 O' 
_chemical_formula_sum 
 'C21 H29 N O3 S' 
_chemical_formula_weight          375.51 
_chemical_absolute_configuration  ad
 
loop_ 
 _atom_type_symbol 
 _atom_type_description 
 _atom_type_scat_dispersion_real 
 _atom_type_scat_dispersion_imag 
 _atom_type_scat_source 
 'C'  'C'   0.0033   0.0016 
 'International Tables Vol C Tables 4.2.6.8 and 6.1.1.4' 
 'H'  'H'   0.0000   0.0000 
 'International Tables Vol C Tables 4.2.6.8 and 6.1.1.4' 
 'N'  'N'   0.0061   0.0033 
 'International Tables Vol C Tables 4.2.6.8 and 6.1.1.4' 
 'O'  'O'   0.0106   0.0060 
 'International Tables Vol C Tables 4.2.6.8 and 6.1.1.4' 
 'S'  'S'   0.1246   0.1234 
 'International Tables Vol C Tables 4.2.6.8 and 6.1.1.4' 
 
_symmetry_cell_setting            'orthorhombic'
_symmetry_space_group_name_H-M    'P 212121'
 
loop_ 
 _symmetry_equiv_pos_as_xyz 
 'x, y, z' 
 '-x+1/2, -y, z+1/2' 
 '-x, y+1/2, -z+1/2' 
 'x+1/2, -y+1/2, -z' 
 
_cell_length_a                    7.0258(5) 
_cell_length_b                    11.5169(7) 
_cell_length_c                    26.2561(17) 
_cell_angle_alpha                 90.00 
_cell_angle_beta                  90.00 
_cell_angle_gamma                 90.00 
_cell_volume                      2124.5(2) 
_cell_formula_units_Z             4 
_cell_measurement_temperature     294(1) 
_cell_measurement_reflns_used     4137 
_cell_measurement_theta_min       2.35 
_cell_measurement_theta_max       21.60
 
_exptl_crystal_description        block 
_exptl_crystal_colour             colorless 
_exptl_crystal_size_max           0.41 
_exptl_crystal_size_mid           0.22
_exptl_crystal_size_min           0.15
_exptl_crystal_density_meas       ? 
_exptl_crystal_density_diffrn     1.174 
_exptl_crystal_density_method     'not measured' 
_exptl_crystal_F_000              808 
_exptl_absorpt_coefficient_mu     0.171 
_exptl_absorpt_correction_type    'multi-scan'
_exptl_absorpt_correction_T_min   0.9207 
_exptl_absorpt_correction_T_max   0.9747 
_exptl_absorpt_process_details    'Bruker/Siemens SADABS V2.03'
 
_exptl_special_details 
; 
 ? 
; 
 
_diffrn_ambient_temperature       294(1) 
_diffrn_radiation_wavelength      0.71073 
_diffrn_radiation_type            MoK\a 
_diffrn_radiation_source          'fine-focus sealed tube' 
_diffrn_radiation_monochromator   graphite 
_diffrn_measurement_device_type  'CCD area detector'
_diffrn_measurement_method       'phi and omega scans'
_diffrn_detector_area_resol_mean  ? 
_diffrn_standards_number          ? 
_diffrn_standards_interval_count  ? 
_diffrn_standards_interval_time   ? 
_diffrn_standards_decay_%         ? 
_diffrn_reflns_number             18322 
_diffrn_reflns_av_R_equivalents   0.0340 
_diffrn_reflns_av_sigmaI/netI     0.0266 
_diffrn_reflns_limit_h_min        -8 
_diffrn_reflns_limit_h_max        8 
_diffrn_reflns_limit_k_min        -13 
_diffrn_reflns_limit_k_max        13 
_diffrn_reflns_limit_l_min        -31 
_diffrn_reflns_limit_l_max        31 
_diffrn_reflns_theta_min          1.93 
_diffrn_reflns_theta_max          25.06 
_reflns_number_total              3757 
_reflns_number_gt                 3305 
_reflns_threshold_expression      'I>2\s(I)'
 
_computing_data_collection        'Bruker SMART V5.625'
_computing_cell_refinement        'Bruker SMART V5.625' 
_computing_data_reduction         'Bruker SAINT V6.28A'
_computing_structure_solution     'SHELXS-97 (Sheldrick, 1997)'
_computing_structure_refinement   'SHELXL-97 (Sheldrick, 1997)' 
_computing_molecular_graphics     'SHELXTL  Rel. 6.12/V (Siemens, 1996)'
_computing_publication_material    'SHELX-97 (Sheldrick, 1997)'
 
_refine_special_details 
; 
 Refinement of F^2^ against ALL reflections.  The weighted R-factor wR and 
 goodness of fit S are based on F^2^, conventional R-factors R are based 
 on F, with F set to zero for negative F^2^. The threshold expression of 
 F^2^ > 2sigma(F^2^) is used only for calculating R-factors(gt) etc. and is 
 not relevant to the choice of reflections for refinement.  R-factors based 
 on F^2^ are statistically about twice as large as those based on F, and R- 
 factors based on ALL data will be even larger. 
; 
 
_refine_ls_structure_factor_coef  Fsqd  
_refine_ls_matrix_type            full 
_refine_ls_weighting_scheme       calc  
_refine_ls_weighting_details 
 'calc w=1/[\s^2^(Fo^2^)+(0.0540P)^2^+0.0383P] where P=(Fo^2^+2Fc^2^)/3' 
_atom_sites_solution_primary      direct 
_atom_sites_solution_secondary    difmap 
_atom_sites_solution_hydrogens    mixed
_refine_ls_hydrogen_treatment     mixed 
_refine_ls_extinction_method      none 
_refine_ls_extinction_coef        ? 
_refine_ls_abs_structure_details 
 'Flack H D (1983), Acta Cryst. A39, 876-881' 
_refine_ls_abs_structure_Flack    0.00(7) 
_refine_ls_number_reflns          3757 
_refine_ls_number_parameters      248 
_refine_ls_number_restraints      0 
_refine_ls_R_factor_all           0.0423 
_refine_ls_R_factor_gt            0.0350 
_refine_ls_wR_factor_ref          0.0916 
_refine_ls_wR_factor_gt           0.0867 
_refine_ls_goodness_of_fit_ref    1.038 
_refine_ls_restrained_S_all       1.038 
_refine_ls_shift/su_max           0.023 
_refine_ls_shift/su_mean          0.002 
 
loop_ 
 _atom_site_label 
 _atom_site_type_symbol 
 _atom_site_fract_x 
 _atom_site_fract_y 
 _atom_site_fract_z 
 _atom_site_U_iso_or_equiv 
 _atom_site_adp_type 
 _atom_site_occupancy 
 _atom_site_symmetry_multiplicity 
 _atom_site_calc_flag 
 _atom_site_refinement_flags 
 _atom_site_disorder_assembly 
 _atom_site_disorder_group 
C1 C -0.0951(3) 0.72020(18) 0.02492(9) 0.0542(5) Uani 1 1 d . . . 
C2 C -0.0946(3) 0.6728(2) -0.02331(9) 0.0653(6) Uani 1 1 d . . . 
H2 H -0.0905 0.5926 -0.0272 0.078 Uiso 1 1 calc R . . 
C3 C -0.0999(4) 0.7434(3) -0.06612(12) 0.0831(8) Uani 1 1 d . . . 
H3 H -0.0998 0.7105 -0.0985 0.100 Uiso 1 1 calc R . . 
C4 C -0.1052(4) 0.8610(3) -0.06058(15) 0.0900(10) Uani 1 1 d . . . 
H4 H -0.1093 0.9082 -0.0893 0.108 Uiso 1 1 calc R . . 
C5 C -0.1047(4) 0.9104(3) -0.01325(16) 0.0885(10) Uani 1 1 d . . . 
H5 H -0.1067 0.9908 -0.0097 0.106 Uiso 1 1 calc R . . 
C6 C -0.1011(3) 0.8399(2) 0.02931(11) 0.0692(7) Uani 1 1 d . . . 
H6 H -0.1028 0.8736 0.0615 0.083 Uiso 1 1 calc R . . 
C7 C -0.0869(3) 0.64865(18) 0.07208(9) 0.0519(5) Uani 1 1 d . . . 
O1 O -0.0813(3) 0.69405(13) 0.11355(7) 0.0756(5) Uani 1 1 d . . . 
C8 C -0.0803(3) 0.51789(16) 0.06694(8) 0.0489(5) Uani 1 1 d . . . 
H8A H 0.0278 0.4969 0.0459 0.059 Uiso 1 1 calc R . . 
H8B H -0.1946 0.4919 0.0496 0.059 Uiso 1 1 calc R . . 
C9 C -0.0645(3) 0.45444(16) 0.11794(8) 0.0446(4) Uani 1 1 d . . . 
H9 H 0.0293 0.4954 0.1389 0.053 Uiso 1 1 calc R . . 
C10 C -0.2539(3) 0.45346(18) 0.14686(7) 0.0501(5) Uani 1 1 d . . . 
H10A H -0.3103 0.5302 0.1450 0.060 Uiso 1 1 calc R . . 
H10B H -0.3400 0.3997 0.1302 0.060 Uiso 1 1 calc R . . 
C11 C -0.2344(3) 0.4194(2) 0.20197(8) 0.0662(6) Uani 1 1 d . . . 
H11A H -0.1712 0.3446 0.2035 0.079 Uiso 1 1 calc R . . 
H11B H -0.1518 0.4754 0.2185 0.079 Uiso 1 1 calc R . . 
C12 C -0.4154(3) 0.4113(2) 0.23223(8) 0.0541(5) Uani 1 1 d . . . 
C13 C -0.5614(3) 0.4898(2) 0.22611(9) 0.0634(6) Uani 1 1 d . . . 
H13 H -0.5492 0.5490 0.2022 0.076 Uiso 1 1 calc R . . 
C14 C -0.7261(4) 0.4822(3) 0.25482(9) 0.0743(7) Uani 1 1 d . . . 
H14 H -0.8229 0.5361 0.2499 0.089 Uiso 1 1 calc R . . 
C15 C -0.7480(5) 0.3974(3) 0.28996(10) 0.0825(8) Uani 1 1 d . . . 
H15 H -0.8592 0.3927 0.3091 0.099 Uiso 1 1 calc R . . 
C16 C -0.6064(5) 0.3193(3) 0.29707(10) 0.0852(8) Uani 1 1 d . . . 
H16 H -0.6203 0.2610 0.3213 0.102 Uiso 1 1 calc R . . 
C17 C -0.4402(4) 0.3254(2) 0.26842(10) 0.0755(7) Uani 1 1 d . . . 
H17 H -0.3445 0.2710 0.2737 0.091 Uiso 1 1 calc R . . 
N1 N 0.0005(2) 0.33305(15) 0.11165(7) 0.0457(4) Uani 1 1 d . . . 
H1N H -0.054(4) 0.297(2) 0.0898(9) 0.068 Uiso 1 1 d . . . 
S1 S 0.23046(6) 0.30891(4) 0.113611(17) 0.04285(14) Uani 1 1 d . . . 
O2 O 0.31842(19) 0.31154(13) 0.06171(5) 0.0552(4) Uani 1 1 d . . . 
C18 C 0.2293(3) 0.15479(17) 0.13213(8) 0.0518(5) Uani 1 1 d . . . 
C19 C 0.1377(5) 0.1463(3) 0.18395(11) 0.0890(9) Uani 1 1 d . . . 
H19A H 0.0021 0.1534 0.1805 0.133 Uiso 1 1 calc R . . 
H19B H 0.1847 0.2075 0.2054 0.133 Uiso 1 1 calc R . . 
H19C H 0.1678 0.0725 0.1989 0.133 Uiso 1 1 calc R . . 
C20 C 0.4373(4) 0.1201(2) 0.13514(12) 0.0819(8) Uani 1 1 d . . . 
H20A H 0.5040 0.1732 0.1570 0.123 Uiso 1 1 calc R . . 
H20B H 0.4924 0.1224 0.1017 0.123 Uiso 1 1 calc R . . 
H20C H 0.4473 0.0429 0.1486 0.123 Uiso 1 1 calc R . . 
C21 C 0.1243(5) 0.0831(2) 0.09261(12) 0.0852(9) Uani 1 1 d . . . 
H21A H 0.1335 0.0023 0.1013 0.128 Uiso 1 1 calc R . . 
H21B H 0.1802 0.0958 0.0597 0.128 Uiso 1 1 calc R . . 
H21C H -0.0071 0.1058 0.0919 0.128 Uiso 1 1 calc R . . 
O1W O 0.2135(3) 0.2493(2) -0.03737(7) 0.0881(7) Uani 1 1 d . . . 
H1W H 0.099(6) 0.223(3) -0.0424(13) 0.132 Uiso 1 1 d . . . 
H2W H 0.237(6) 0.272(3) -0.0092(15) 0.132 Uiso 1 1 d . . . 
 
loop_ 
 _atom_site_aniso_label 
 _atom_site_aniso_U_11 
 _atom_site_aniso_U_22 
 _atom_site_aniso_U_33 
 _atom_site_aniso_U_23 
 _atom_site_aniso_U_13 
 _atom_site_aniso_U_12 
C1 0.0375(11) 0.0500(13) 0.0750(16) 0.0132(11) 0.0012(10) -0.0007(9) 
C2 0.0603(14) 0.0679(15) 0.0676(15) 0.0139(13) 0.0093(12) 0.0001(13) 
C3 0.0665(17) 0.103(2) 0.0799(19) 0.0317(16) 0.0062(16) 0.0024(17) 
C4 0.0469(15) 0.108(3) 0.115(3) 0.062(2) -0.0031(17) -0.0072(16) 
C5 0.0581(17) 0.0610(17) 0.146(3) 0.041(2) -0.0160(19) -0.0081(14) 
C6 0.0563(14) 0.0504(14) 0.1008(19) 0.0138(13) -0.0150(14) -0.0037(11) 
C7 0.0422(11) 0.0500(12) 0.0636(14) 0.0012(11) 0.0071(10) 0.0021(9) 
O1 0.1015(13) 0.0558(9) 0.0695(11) -0.0076(9) 0.0089(10) 0.0064(9) 
C8 0.0474(12) 0.0461(11) 0.0533(12) 0.0037(9) 0.0087(10) 0.0021(10) 
C9 0.0411(10) 0.0430(10) 0.0496(11) -0.0002(9) 0.0019(9) 0.0031(8) 
C10 0.0437(11) 0.0543(11) 0.0521(11) 0.0022(9) 0.0051(10) 0.0054(11) 
C11 0.0505(13) 0.0968(17) 0.0514(12) 0.0033(12) 0.0019(11) 0.0123(14) 
C12 0.0575(13) 0.0607(13) 0.0441(12) -0.0067(10) 0.0034(10) -0.0008(12) 
C13 0.0583(15) 0.0738(16) 0.0581(14) 0.0017(12) 0.0101(11) 0.0033(13) 
C14 0.0566(15) 0.0953(19) 0.0709(15) -0.0142(14) 0.0151(13) 0.0008(14) 
C15 0.0715(18) 0.104(2) 0.0717(17) -0.0177(16) 0.0214(16) -0.0207(19) 
C16 0.102(2) 0.0815(19) 0.0717(17) 0.0069(15) 0.0235(16) -0.021(2) 
C17 0.0854(18) 0.0705(16) 0.0707(16) 0.0026(14) 0.0099(14) 0.0071(15) 
N1 0.0416(9) 0.0458(10) 0.0496(10) -0.0023(8) -0.0024(8) 0.0000(7) 
S1 0.0402(2) 0.0442(2) 0.0441(3) 0.0008(2) -0.0011(2) 0.0001(2) 
O2 0.0502(8) 0.0648(9) 0.0505(8) 0.0090(7) 0.0096(6) 0.0018(7) 
C18 0.0570(13) 0.0466(11) 0.0517(11) 0.0094(9) 0.0005(10) 0.0022(10) 
C19 0.106(2) 0.0832(19) 0.0773(19) 0.0340(15) 0.0254(16) 0.0115(17) 
C20 0.0683(17) 0.0708(17) 0.107(2) 0.0275(15) -0.0006(15) 0.0213(14) 
C21 0.103(2) 0.0457(14) 0.107(2) -0.0060(13) -0.0193(17) -0.0021(15) 
O1W 0.0539(10) 0.1492(19) 0.0613(11) -0.0168(11) 0.0037(9) 0.0005(11) 
 
_geom_special_details 
; 
 All esds (except the esd in the dihedral angle between two l.s. planes) 
 are estimated using the full covariance matrix.  The cell esds are taken 
 into account individually in the estimation of esds in distances, angles 
 and torsion angles; correlations between esds in cell parameters are only 
 used when they are defined by crystal symmetry.  An approximate (isotropic) 
 treatment of cell esds is used for estimating esds involving l.s. planes. 
; 
 
loop_ 
 _geom_bond_atom_site_label_1 
 _geom_bond_atom_site_label_2 
 _geom_bond_distance 
 _geom_bond_site_symmetry_2 
 _geom_bond_publ_flag 
C1 C2 1.379(3) . ? 
C1 C6 1.384(3) . ? 
C1 C7 1.489(3) . ? 
C2 C3 1.388(4) . ? 
C2 H2 0.9300 . ? 
C3 C4 1.363(4) . ? 
C3 H3 0.9300 . ? 
C4 C5 1.367(5) . ? 
C4 H4 0.9300 . ? 
C5 C6 1.381(4) . ? 
C5 H5 0.9300 . ? 
C6 H6 0.9300 . ? 
C7 O1 1.208(3) . ? 
C7 C8 1.513(3) . ? 
C8 C9 1.530(3) . ? 
C8 H8A 0.9700 . ? 
C8 H8B 0.9700 . ? 
C9 N1 1.480(2) . ? 
C9 C10 1.532(3) . ? 
C9 H9 0.9800 . ? 
C10 C11 1.505(3) . ? 
C10 H10A 0.9700 . ? 
C10 H10B 0.9700 . ? 
C11 C12 1.502(3) . ? 
C11 H11A 0.9700 . ? 
C11 H11B 0.9700 . ? 
C12 C13 1.376(3) . ? 
C12 C17 1.383(3) . ? 
C13 C14 1.383(3) . ? 
C13 H13 0.9300 . ? 
C14 C15 1.353(4) . ? 
C14 H14 0.9300 . ? 
C15 C16 1.354(4) . ? 
C15 H15 0.9300 . ? 
C16 C17 1.390(4) . ? 
C16 H16 0.9300 . ? 
C17 H17 0.9300 . ? 
N1 S1 1.6400(16) . ? 
N1 H1N 0.80(2) . ? 
S1 O2 1.4965(14) . ? 
S1 C18 1.8403(19) . ? 
C18 C19 1.509(3) . ? 
C18 C20 1.517(3) . ? 
C18 C21 1.518(3) . ? 
C19 H19A 0.9600 . ? 
C19 H19B 0.9600 . ? 
C19 H19C 0.9600 . ? 
C20 H20A 0.9600 . ? 
C20 H20B 0.9600 . ? 
C20 H20C 0.9600 . ? 
C21 H21A 0.9600 . ? 
C21 H21B 0.9600 . ? 
C21 H21C 0.9600 . ? 
O1W H1W 0.87(4) . ? 
O1W H2W 0.80(4) . ? 
 
loop_ 
 _geom_angle_atom_site_label_1 
 _geom_angle_atom_site_label_2 
 _geom_angle_atom_site_label_3 
 _geom_angle 
 _geom_angle_site_symmetry_1 
 _geom_angle_site_symmetry_3 
 _geom_angle_publ_flag 
C2 C1 C6 118.1(2) . . ? 
C2 C1 C7 123.0(2) . . ? 
C6 C1 C7 118.9(2) . . ? 
C1 C2 C3 120.8(3) . . ? 
C1 C2 H2 119.6 . . ? 
C3 C2 H2 119.6 . . ? 
C4 C3 C2 119.8(3) . . ? 
C4 C3 H3 120.1 . . ? 
C2 C3 H3 120.1 . . ? 
C3 C4 C5 120.7(3) . . ? 
C3 C4 H4 119.6 . . ? 
C5 C4 H4 119.6 . . ? 
C4 C5 C6 119.4(3) . . ? 
C4 C5 H5 120.3 . . ? 
C6 C5 H5 120.3 . . ? 
C5 C6 C1 121.2(3) . . ? 
C5 C6 H6 119.4 . . ? 
C1 C6 H6 119.4 . . ? 
O1 C7 C1 120.7(2) . . ? 
O1 C7 C8 120.7(2) . . ? 
C1 C7 C8 118.6(2) . . ? 
C7 C8 C9 113.56(18) . . ? 
C7 C8 H8A 108.9 . . ? 
C9 C8 H8A 108.9 . . ? 
C7 C8 H8B 108.9 . . ? 
C9 C8 H8B 108.9 . . ? 
H8A C8 H8B 107.7 . . ? 
N1 C9 C8 112.07(16) . . ? 
N1 C9 C10 108.46(15) . . ? 
C8 C9 C10 112.00(16) . . ? 
N1 C9 H9 108.1 . . ? 
C8 C9 H9 108.1 . . ? 
C10 C9 H9 108.1 . . ? 
C11 C10 C9 113.56(18) . . ? 
C11 C10 H10A 108.9 . . ? 
C9 C10 H10A 108.9 . . ? 
C11 C10 H10B 108.9 . . ? 
C9 C10 H10B 108.9 . . ? 
H10A C10 H10B 107.7 . . ? 
C12 C11 C10 116.61(19) . . ? 
C12 C11 H11A 108.1 . . ? 
C10 C11 H11A 108.1 . . ? 
C12 C11 H11B 108.1 . . ? 
C10 C11 H11B 108.1 . . ? 
H11A C11 H11B 107.3 . . ? 
C13 C12 C17 117.1(2) . . ? 
C13 C12 C11 121.9(2) . . ? 
C17 C12 C11 121.0(2) . . ? 
C12 C13 C14 121.2(2) . . ? 
C12 C13 H13 119.4 . . ? 
C14 C13 H13 119.4 . . ? 
C15 C14 C13 120.8(3) . . ? 
C15 C14 H14 119.6 . . ? 
C13 C14 H14 119.6 . . ? 
C14 C15 C16 119.4(3) . . ? 
C14 C15 H15 120.3 . . ? 
C16 C15 H15 120.3 . . ? 
C15 C16 C17 120.6(3) . . ? 
C15 C16 H16 119.7 . . ? 
C17 C16 H16 119.7 . . ? 
C12 C17 C16 120.9(3) . . ? 
C12 C17 H17 119.5 . . ? 
C16 C17 H17 119.5 . . ? 
C9 N1 S1 117.45(13) . . ? 
C9 N1 H1N 114.7(18) . . ? 
S1 N1 H1N 113.8(18) . . ? 
O2 S1 N1 112.00(9) . . ? 
O2 S1 C18 105.18(9) . . ? 
N1 S1 C18 99.65(10) . . ? 
C19 C18 C20 110.3(2) . . ? 
C19 C18 C21 111.9(2) . . ? 
C20 C18 C21 111.1(2) . . ? 
C19 C18 S1 107.63(16) . . ? 
C20 C18 S1 105.27(15) . . ? 
C21 C18 S1 110.27(15) . . ? 
C18 C19 H19A 109.5 . . ? 
C18 C19 H19B 109.5 . . ? 
H19A C19 H19B 109.5 . . ? 
C18 C19 H19C 109.5 . . ? 
H19A C19 H19C 109.5 . . ? 
H19B C19 H19C 109.5 . . ? 
C18 C20 H20A 109.5 . . ? 
C18 C20 H20B 109.5 . . ? 
H20A C20 H20B 109.5 . . ? 
C18 C20 H20C 109.5 . . ? 
H20A C20 H20C 109.5 . . ? 
H20B C20 H20C 109.5 . . ? 
C18 C21 H21A 109.5 . . ? 
C18 C21 H21B 109.5 . . ? 
H21A C21 H21B 109.5 . . ? 
C18 C21 H21C 109.5 . . ? 
H21A C21 H21C 109.5 . . ? 
H21B C21 H21C 109.5 . . ? 
H1W O1W H2W 116(4) . . ? 
 
_diffrn_measured_fraction_theta_max    0.995 
_diffrn_reflns_theta_full              25.06 
_diffrn_measured_fraction_theta_full   0.995 
_refine_diff_density_max    0.202 
_refine_diff_density_min   -0.159 
_refine_diff_density_rms    0.029 
